# Supplementary material for: Fluorescent Probes for Insect Ryanodine Receptors: Candidate Anthranilic Diamides
Source: PubMed Central journal article supplement (PMC6270845; doi:10.3390/molecules19044105), 2014-04-02

# Supporting Information

Figure S1. NMR Spectra for the new compounds.

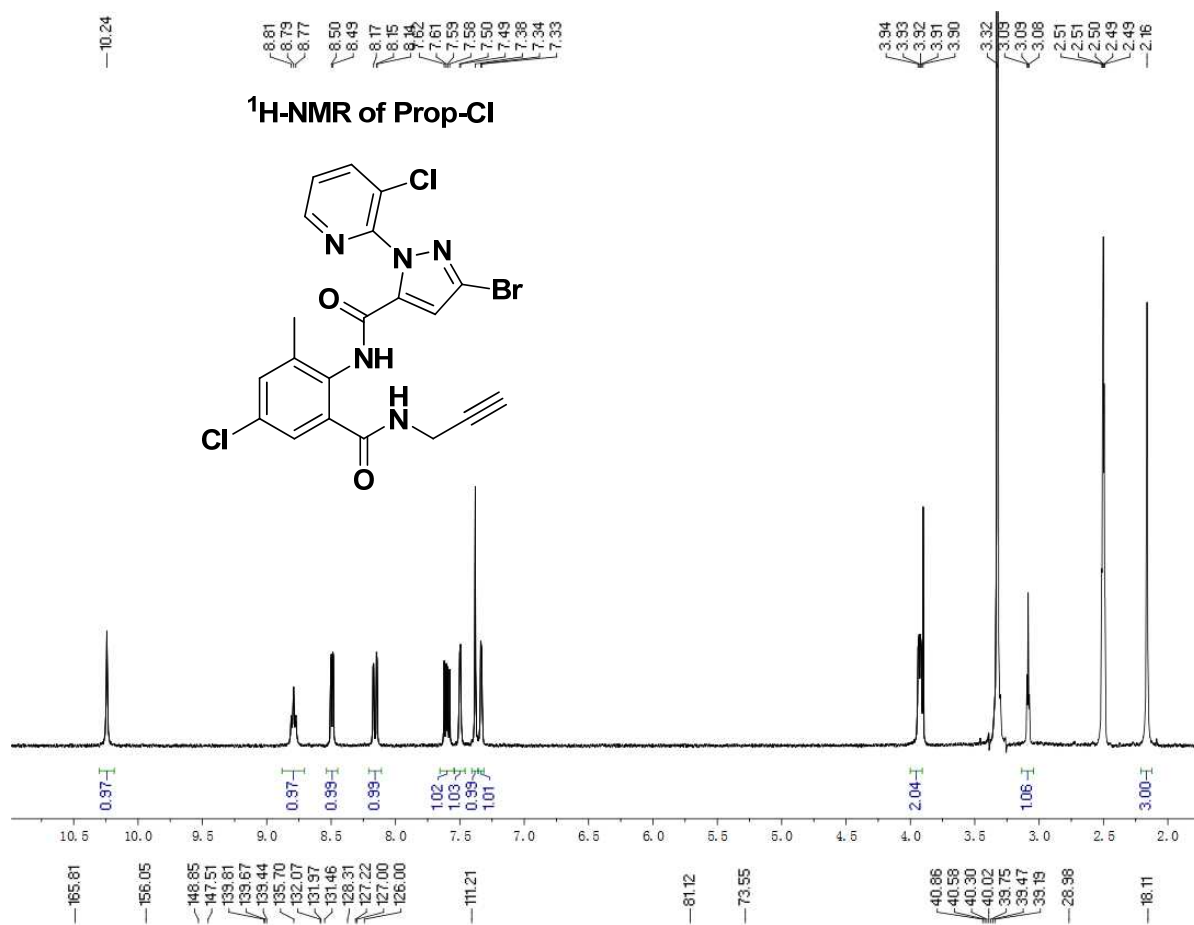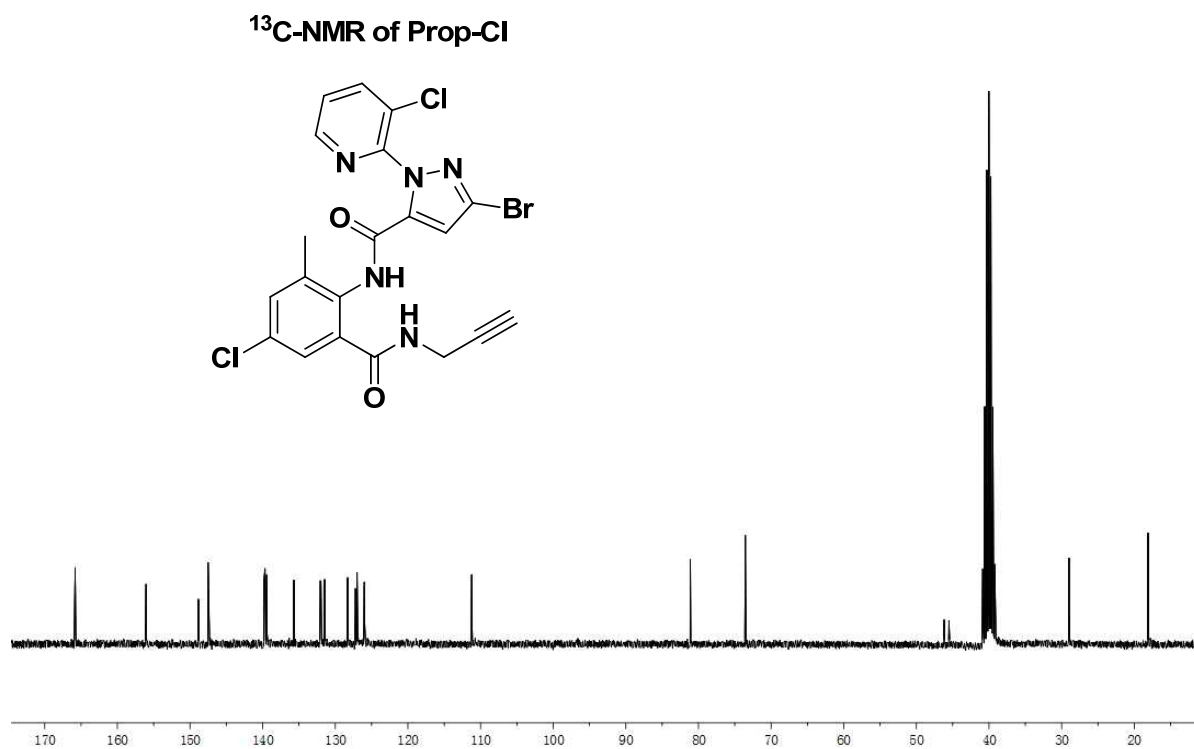

Figure S1. Cont.

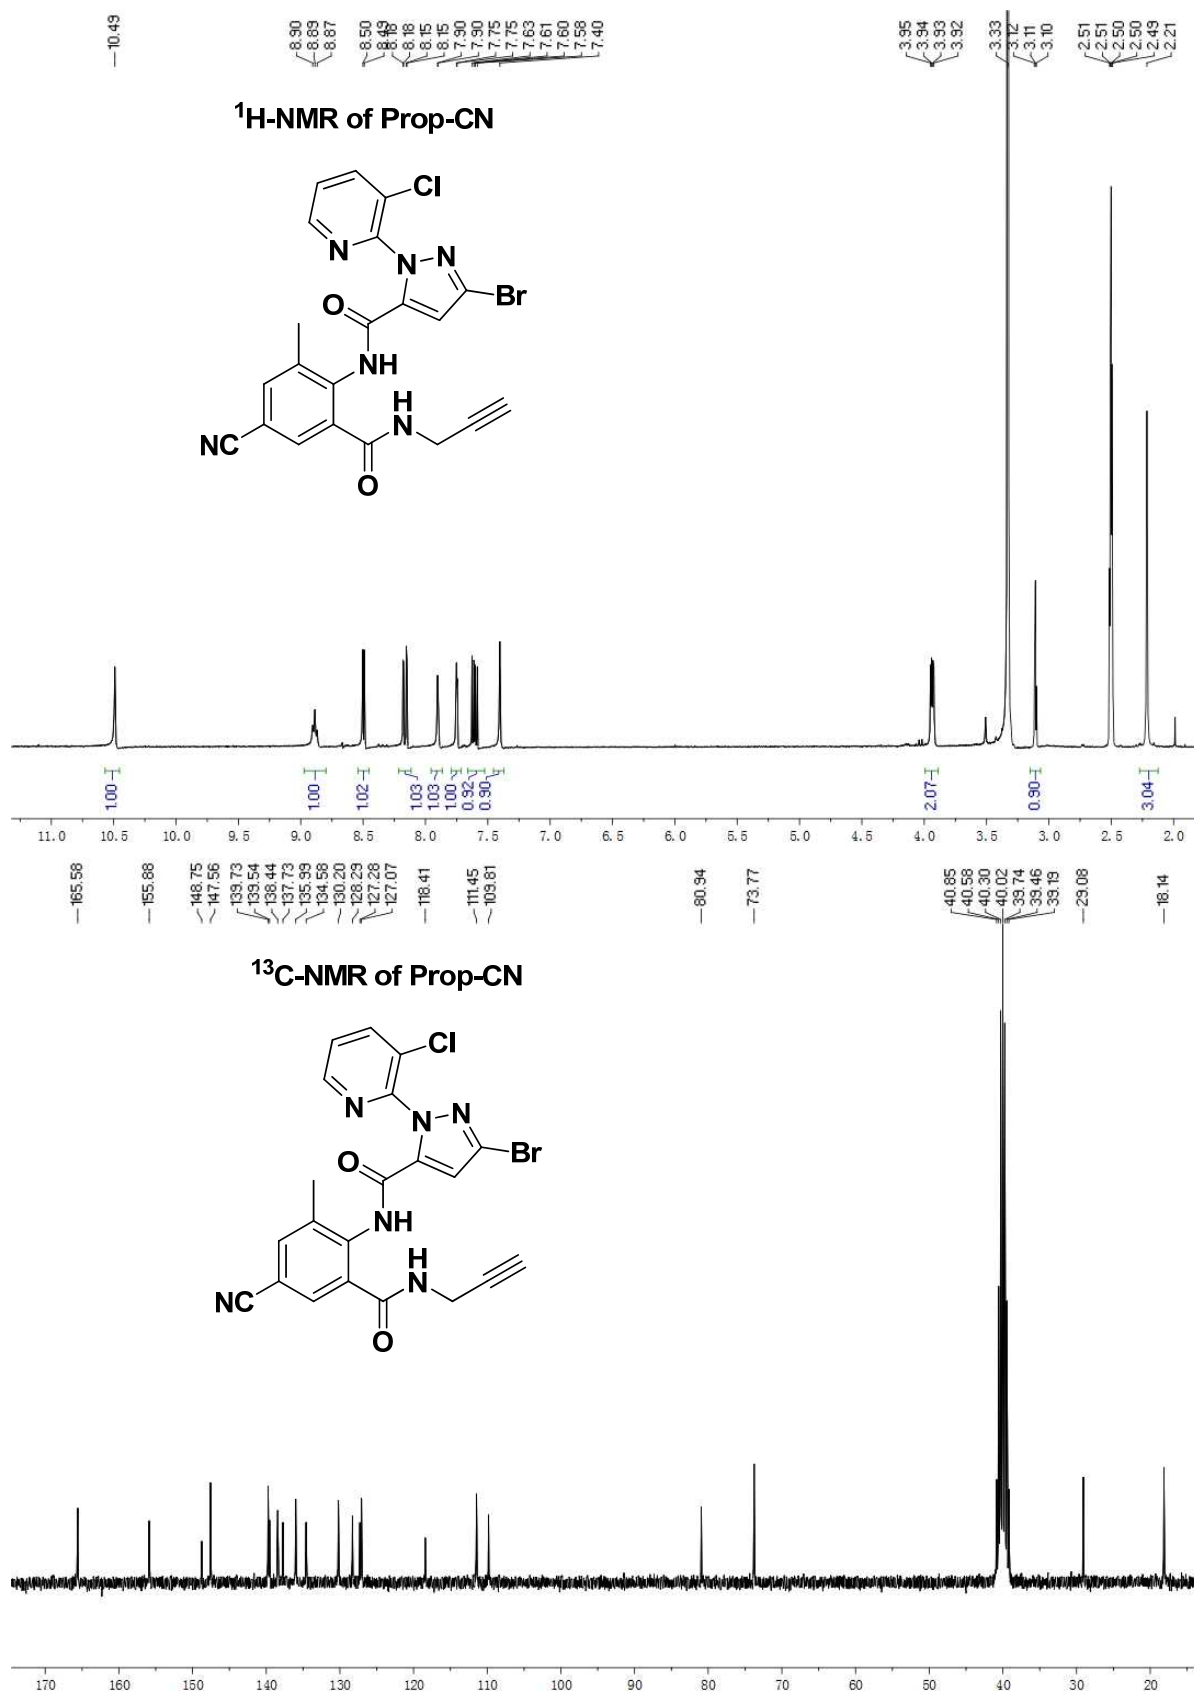

Figure S1. Cont.

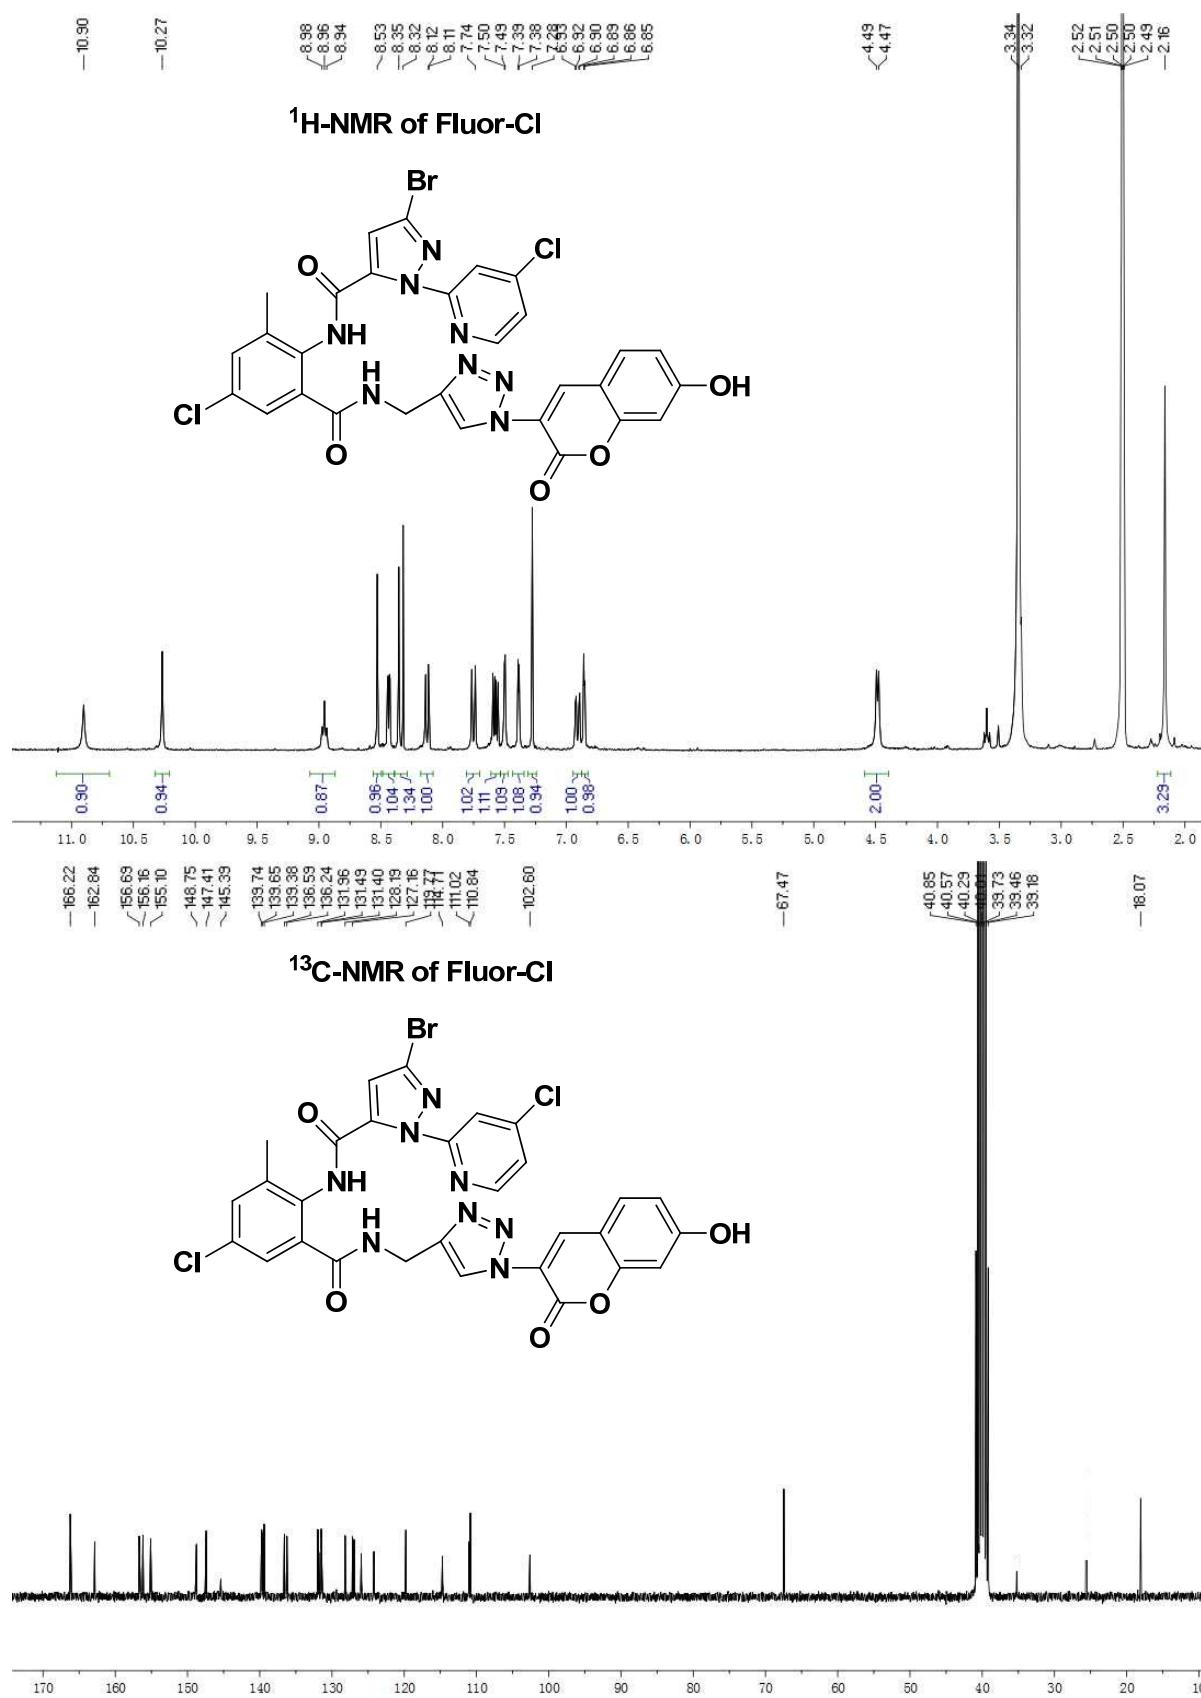

Figure S1. Cont.

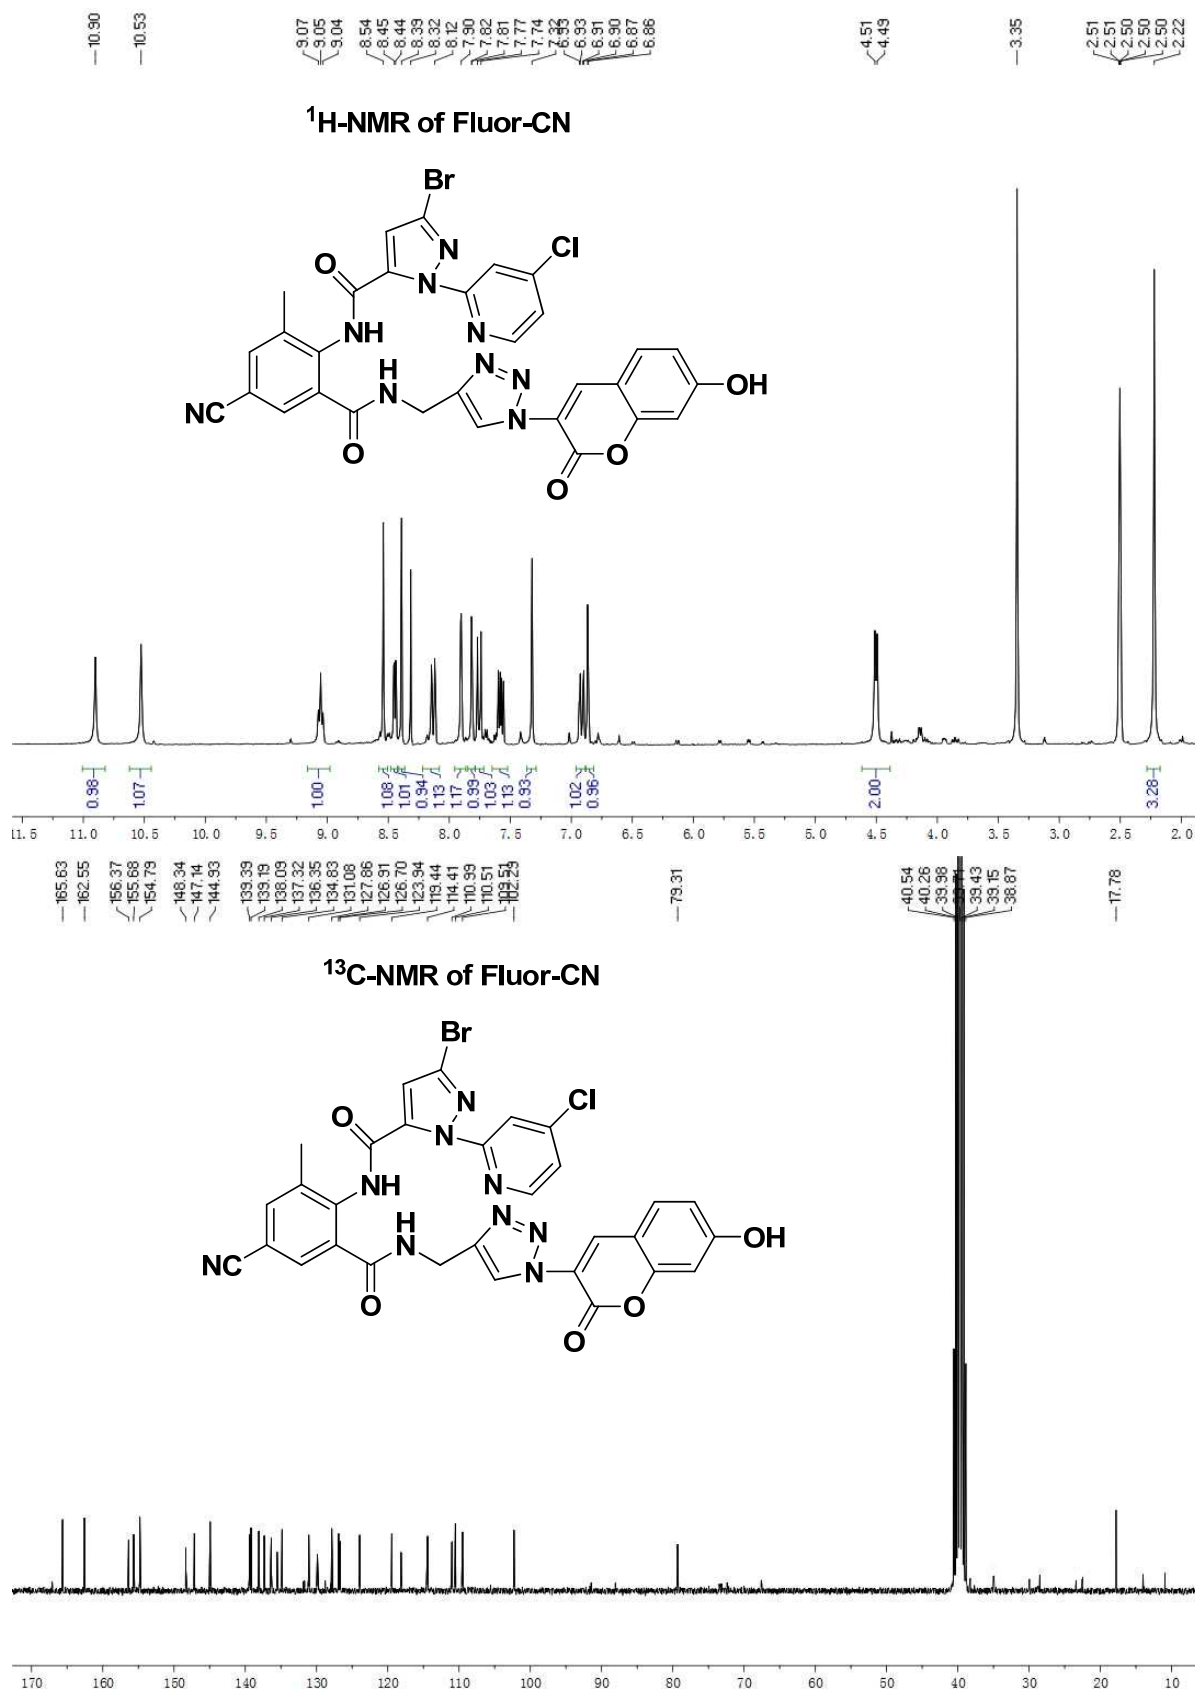

Supplement: molecules-19-04105-s001.pdf [file molecules-19-04105-s001.pdf]
